# Supplementary material
Source: PubMed Central journal article supplement (PMC3320176)
Supplement: supp_pp.112.193300_193300Supplemantal_data.pdf [file supp_pp.112.193300_193300Supplemantal_data.pdf]

**Supplemental Table**

Sequences of primers used in this study.

| <b>Primers</b>        | <b>Sequences</b>                        |
|-----------------------|-----------------------------------------|
| PsprHsp93-delN-F      | agtgctgacagtggtaccgctactgttggc          |
| PsprHsp93-delN-R      | tctaggaatgaatctcttagcccttgcccg          |
| PsprHsp93-delD1-F     | gaagaggcaaaagaacttgacaaggaggtc          |
| PsprHsp93-delD1-R     | ctcaccacccatgccaataacctgtgtg            |
| PsprHsp93-delSpacer-F | attcctgttgataaagtctcagcagatgaatc        |
| PsprHsp93-delSpacer-R | tggcaactgtgcatgttgaagacggactc           |
| PsprHsp93-I584amber-F | gtgtcctcctggacaggctagcctgttgataaagtctca |
| PsprHsp93-I584amber-R | tgagactttatcaacaggctagcctgtccaggaggacac |
| mHsp93-delN-F-NdeI    | gcacatatgagtgctgacagtggtaccgctac        |
| mHsp93-delN-R-NotI    | cgtagcgccgcttatatagaagagcctctgg         |
| atHsp93V/F7-PstI      | ctctgttacgcttcaatcgaactcgg              |
| atHsp93V/R7-KpnI      | gctttttatttaagcaacaggagag               |
| atHsp93V-delN-F       | aacaatgaagtaactgctaattgtgggggaggaagc    |
| atHsp93V-delN-R       | ttcaccgtaaaccggctagctttccccttg          |
| atHsp93V/F8-KpnI      | caggaccatggctatggccacaagggtgtg          |
| atHsp93V/R8-PstI      | cactgcagttaagcaacaggagagagaatcttcc      |
| atHsp93V-R            | tctgccatactatcctctaaaagcctcat           |
| atClpCV-R1            | ctcatcgctctgtctaatttc                   |
| JL202                 | cattttataataacgctgaggacatctac           |

## Supplemental Figure S1

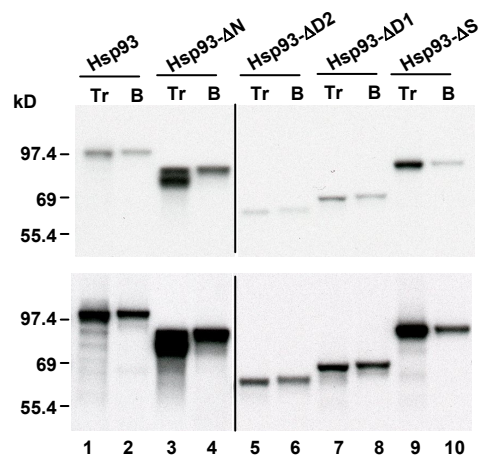

**Supplemental Figure S1.** Association of prHsp93 and the deletion mutants with chloroplasts under binding conditions. In vitro-translated [<sup>35</sup>S]Met-labeled precursors (Tr lanes) were incubated with isolated pea chloroplasts in the presence of 3 mM ATP at 4°C for 5 min (under these conditions precursors can only bind to chloroplasts but can not be translocated across the envelope) and intact chloroplasts (B lanes) were recovered through a 40% Percoll cushion. Samples were analyzed by SDS-PAGE and fluorography. All Tr lanes contain 5% of the translation products used for the B lanes. All B lanes contain 30 μg of total chloroplast proteins in each lane. The lower panel is a longer exposure of the same gel shown in the upper panel. Lanes 1 to 10 were run on the same gels with some lanes in between lanes 4 and 5 removed.

## Supplemental Figure S2

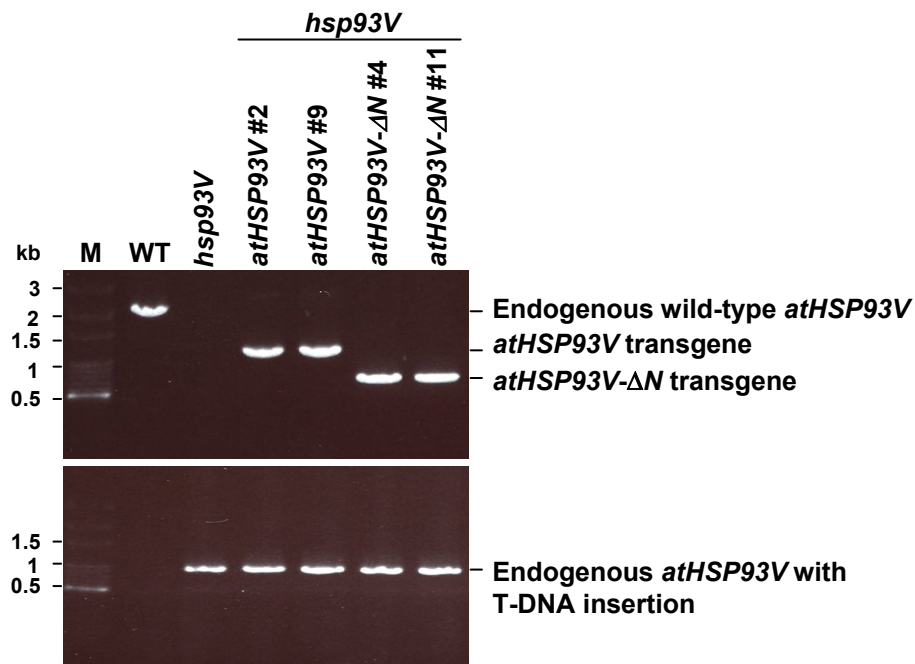

**Supplemental Figure S2.** Genotyping of *atHSP93V* and *atHSP93V-ΔN* transgenic plants. PCR analyses of genomic DNA of wild type (WT), *hsp93V*, and two independent lines of *hsp93V* mutant transformed with *atHSP93V* or *atHSP93V-ΔN*. Primers used for the *atHSP93V* wild-type copy and the transgenes are atHsp93V-F8-KpnI and atClpC-V-R1 and primers used for the T-DNA insertion of the *hsp93V* mutant are JL202 and atHsp93V-R. M, DNA size markers.

## Supplemental Figure S3

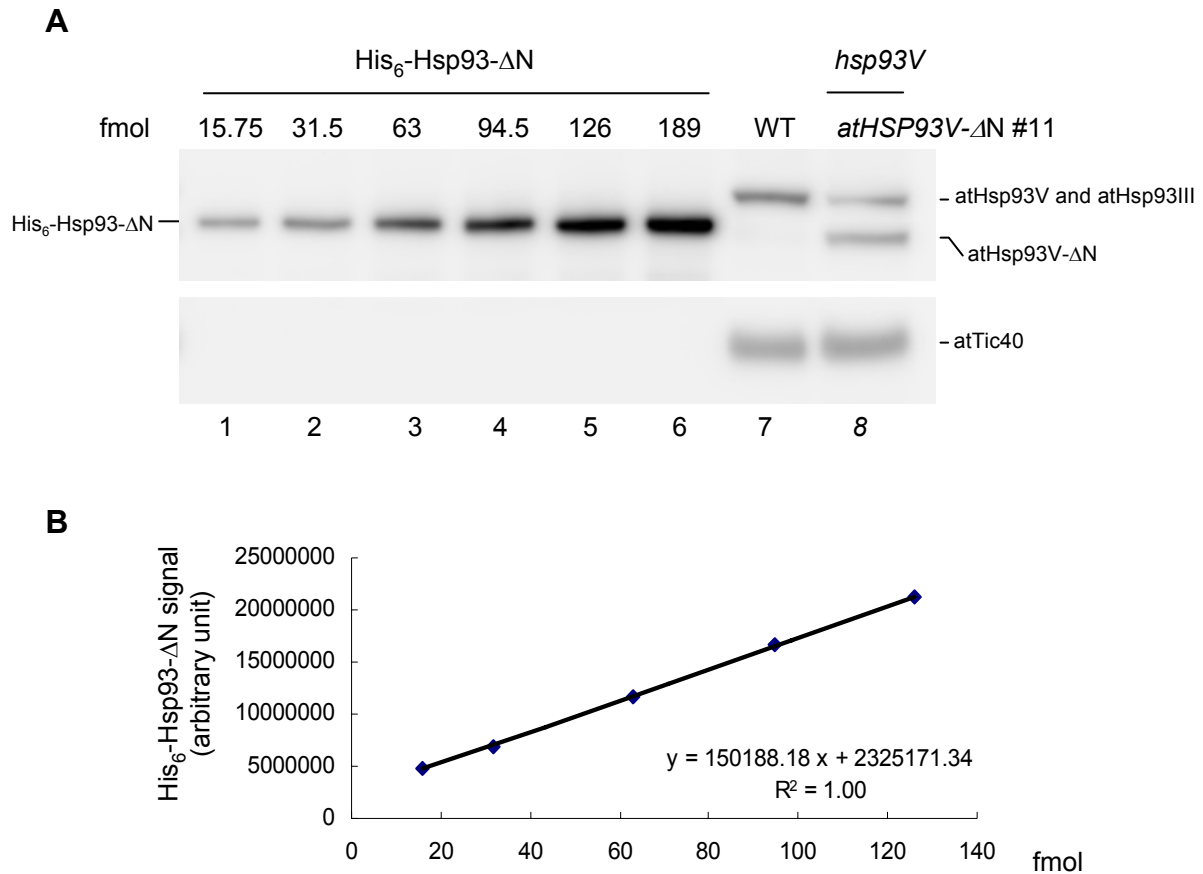

**Supplemental Figure S3.** Wild type and *atHSP93V-ΔN* transgenic plants contain an equal amount of atHsp93 proteins. A, Immunoblot analyses of serial dilutions of His<sub>6</sub>-Hsp93-ΔN proteins and proteins extracted from 15-day-old seedlings of wild type (WT) and the #11 line of the *atHSP93V-ΔN* transformant. Lanes 1 to 6 contain 15.75, 31.5, 63, 94.5, 126 and 189 fmol of His<sub>6</sub>-Hsp93-ΔN proteins, respectively. For plant extracts (lanes 7 and 8), 30 μg of total proteins were analyzed. The gel was analyzed by immunoblotting with antibodies against Hsp93 and atTic40. atTic40 was analyzed as a loading control. B, The chemiluminescence signals as shown in A were quantified and plotted against the amount of His<sub>6</sub>-Hsp93-ΔN proteins. The formula and R<sup>2</sup> are also shown. Based on the formula in B, the amount of total atHsp93 in WT (lane 7 of A), and atHsp93III and atHsp93V-ΔN in *atHSP93V-ΔN* #11 (lane 8 of A) was calculated. In wild type, about 43 fmol of atHsp93 were detected in 30 μg of total proteins. In the *atHSP93V-ΔN* transformant, about 20.9 fmol of atHsp93III and 32 fmol of atHsp93V-ΔN were detected in 30 μg of total proteins. The Tic40 signal in the atHsp93V-ΔN transformant was 1.23 fold of that in the wild type.
